# Supplementary material for: SETDB1-dependent heterochromatin stimulates alternative lengthening of telomeres
Source: PubMed Central journal article supplement — Sci Adv. 2019 May 8;5(5):eaav3673. doi: 10.1126/sciadv.aav3673 (PMC6506250; doi:10.1126/sciadv.aav3673), 2019-05-08
Supplement: aav3673_SM.pdf [file aav3673_SM.pdf]

## Supplementary Materials for

### **SETDB1-dependent heterochromatin stimulates alternative lengthening of telomeres**

Mathilde Gauchier, Sophie Kan, Amandine Barral, Sandrine Sauzet, Eneritz Agirre, Erin Bonnell, Nehmé Saksouk, Teresa K. Barth, Satoru Ide, Serge Urbach, Raymund J. Wellinger, Reini F. Luco, Axel Imhof, Jérôme Déjardin\*

\*Corresponding author. Email: [jerome.dejardin@igh.cnrs.fr](mailto:jerome.dejardin@igh.cnrs.fr)

Published 8 May 2019, *Sci. Adv.* **5**, eaav3673 (2019)

DOI: 10.1126/sciadv.aav3673

#### **The PDF file includes:**

- Fig. S1. SETDB1 telomeric binding is developmentally regulated.
  - Fig. S2. HP1 $\alpha$  stimulates SETDB1-dependent heterochromatin formation at telomeres.
  - Fig. S3. ATRX binds heterochromatic telomeres.
  - Fig. S4. Telomeric heterochromatin stimulates transcriptional elongation.
  - Fig. S5. SETDB1-dependent heterochromatin promotes the recruitment of recombination factors and the appearance of ALT features.
  - Fig. S6. ATRX prevents recombination when telomeres are heterochromatic.
  - Fig. S7. Loss of SETDB1 and not of SUV39H promotes ALT features.
  - Fig. S8. Full membranes from which ChIP figures were prepared.
- Legends for tables S1 and S2

#### **Other Supplementary Material for this manuscript includes the following:**

(available at [advances.sciencemag.org/cgi/content/full/5/5/eaav3673/DC1](https://advances.sciencemag.org/cgi/content/full/5/5/eaav3673/DC1))

Table S1 (Microsoft Excel format). List of factors enriched in the telomere PIC<sub>h</sub> performed with wild-type ESCs.

Table S2 (Microsoft Excel format). List of factors enriched in the telomere PIC<sub>h</sub> performed with wild-type mouse embryonic fibroblast cells.

A

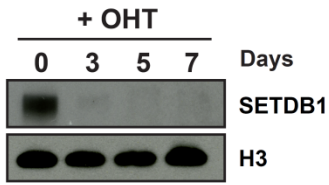

B

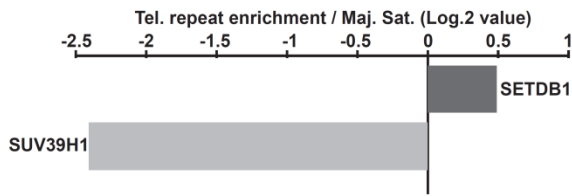

C

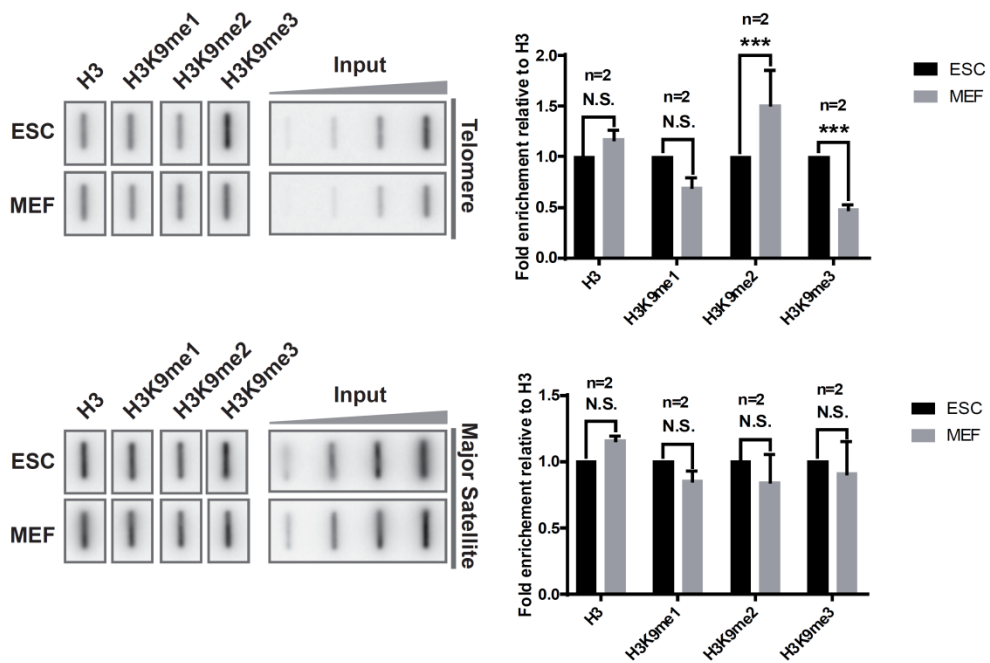

Figure S1

**Fig. S1. SETDB1 telomeric binding is developmentally regulated.** (A) SETDB1 immunoblots against SETDB1) in non-induced wild-type mESCs and *Setdb1* KO cells after different days of tamoxifen (OHT) treatment. (B) ChIP sequencing data from SETDB1 and SUV39H1 libraries plotting the amounts of telomeric reads obtained in both libraries, normalized to the amounts of pericentromeric reads (26, 27). (C) (Left) ChIP experiments using antibodies raised against H3 and mono-, di- and tri-methylated H3K9 in mESCs or MEF. 20% of the immunoprecipitated DNA was blotted and probed with a telomere specific or a major satellite specific probe. 0.01%, 0.05%, 0.25% and 1.25% of input were loaded. (Right) Quantifications representing the enrichment of H3K9 methylation normalized to the total H3 signal and the input relative to ESC. Triple asterisks represent p values below 0.005 (from a Student's t-test).

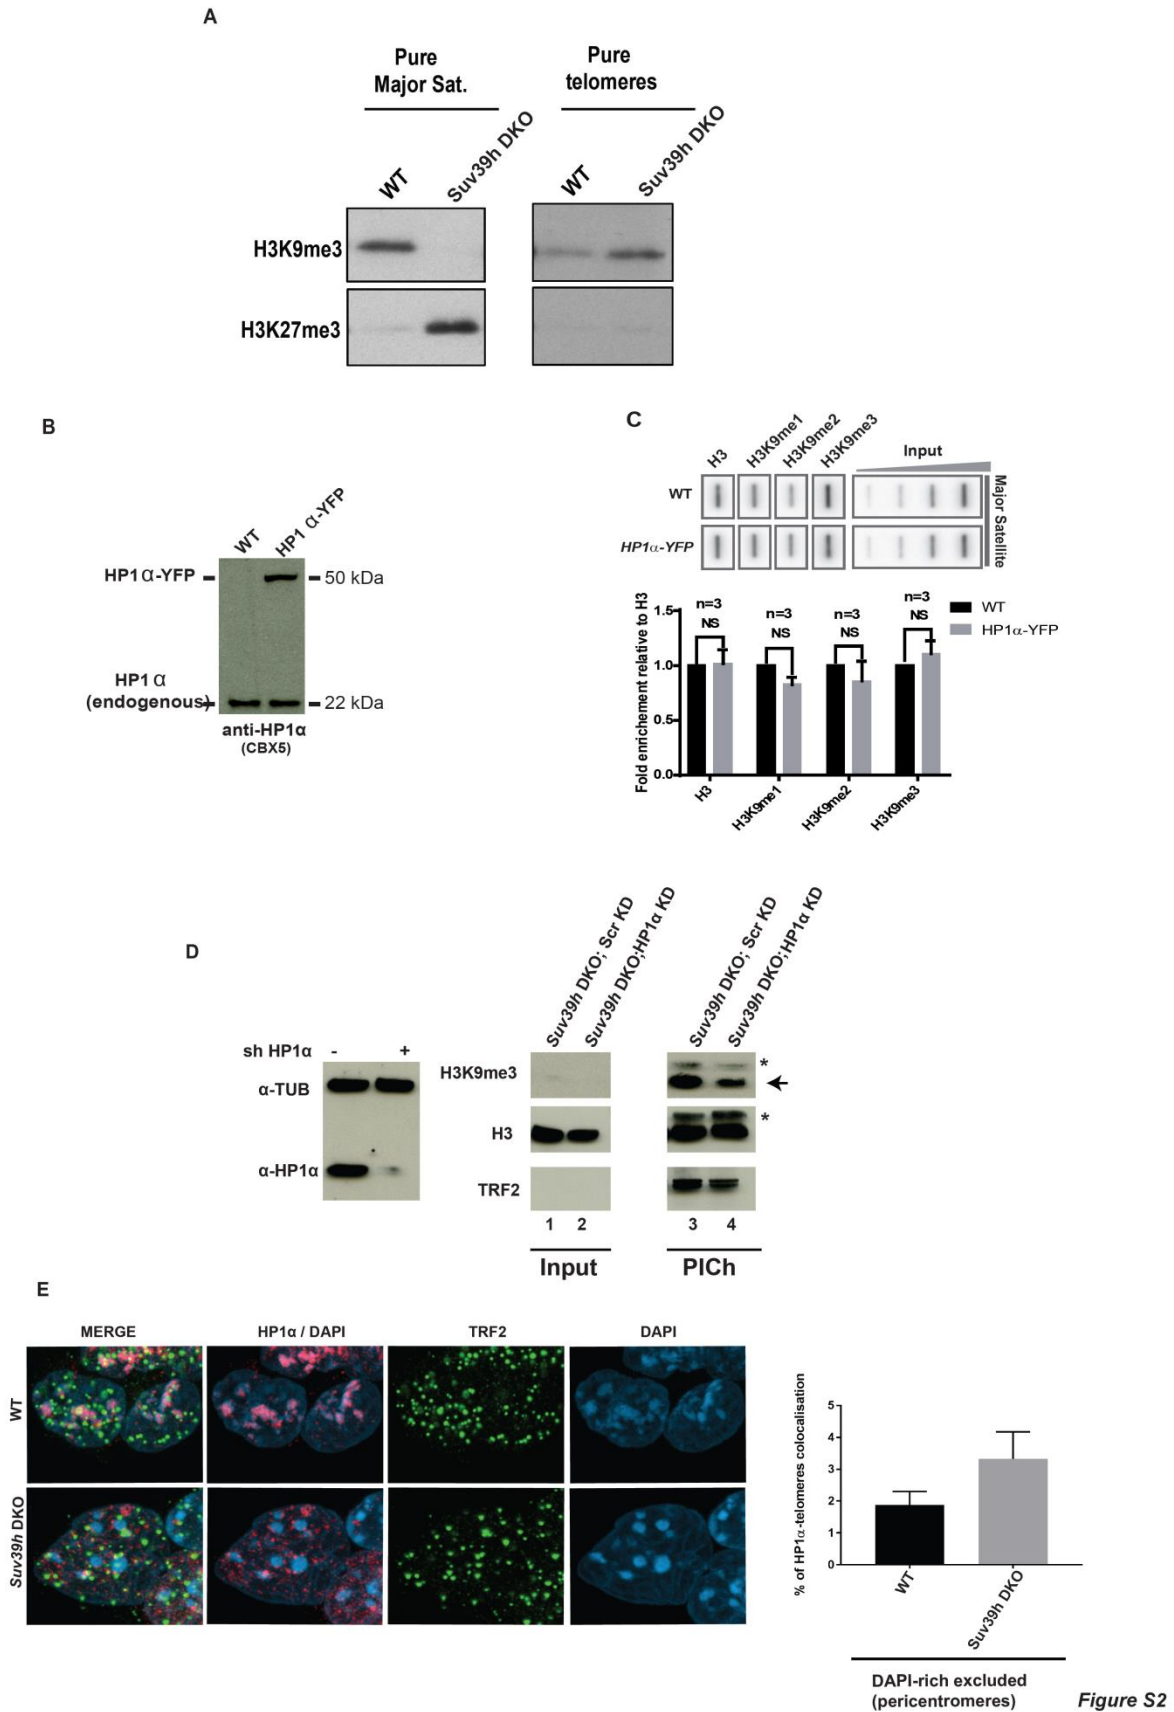

**Fig. S2. HP1 $\alpha$  stimulates SETDB1-dependent heterochromatin formation at telomeres.** (A) Immuno-blots performed on telomeres and pericentromeres nucleosomes obtained from specific PICh purifications in WT or *Suv39h* KO cells for the analysis of the histone marks H3K9me3 and H3K27me3. (B) Immunoblot of HP1 $\alpha$  in control cells and HP1 $\alpha$ -YFP-overexpressing cells. (C) (Top) ChIP experiments in HP1 $\alpha$ -YFP overexpressing cells using antibodies raised against H3 and mono-, di- and tri-methylated H3K9. 20% of the immunoprecipitated DNA was blotted and probed with a pericentromere-specific probe. 0.01%, 0.05%, 0.25% and 1.25% of input were loaded. (Bottom) Quantifications of the fold enrichment of H3K9 methylation normalized to the total H3 signal and the input relative to wild-type cells. (D) (Left): Immunoblot of HP1 $\alpha$  in *Suv39h* KO cells expressing a shRNA scramble (scr) and *Suv39h* KO cells expressing an shRNA for HP1 $\alpha$ . (Right): Immunoblots of TRF2, H3 and H3K9me3 in input samples and in telomere PICh preparations from the *Suv39h* KO;Scr and the *Suv39h* KO cells knockdown for HP1 $\alpha$ . The asterisk denotes a non-specific band that we obtain upon PICh material decrosslinking. (E) Co-immuno-staining analysis showing HP1 $\alpha$  (red) and TRF2 (green) signals co-localization in *Suv39h* KO cells. Due to the large enrichment of HP1 $\alpha$  in the chromocenters (pericentromeric region corresponding to DAPI rich region) in the wild-type background, only the TRF2 signals found outside the DAPI bright regions were taken into account for counting and statistical analyses (right panels).

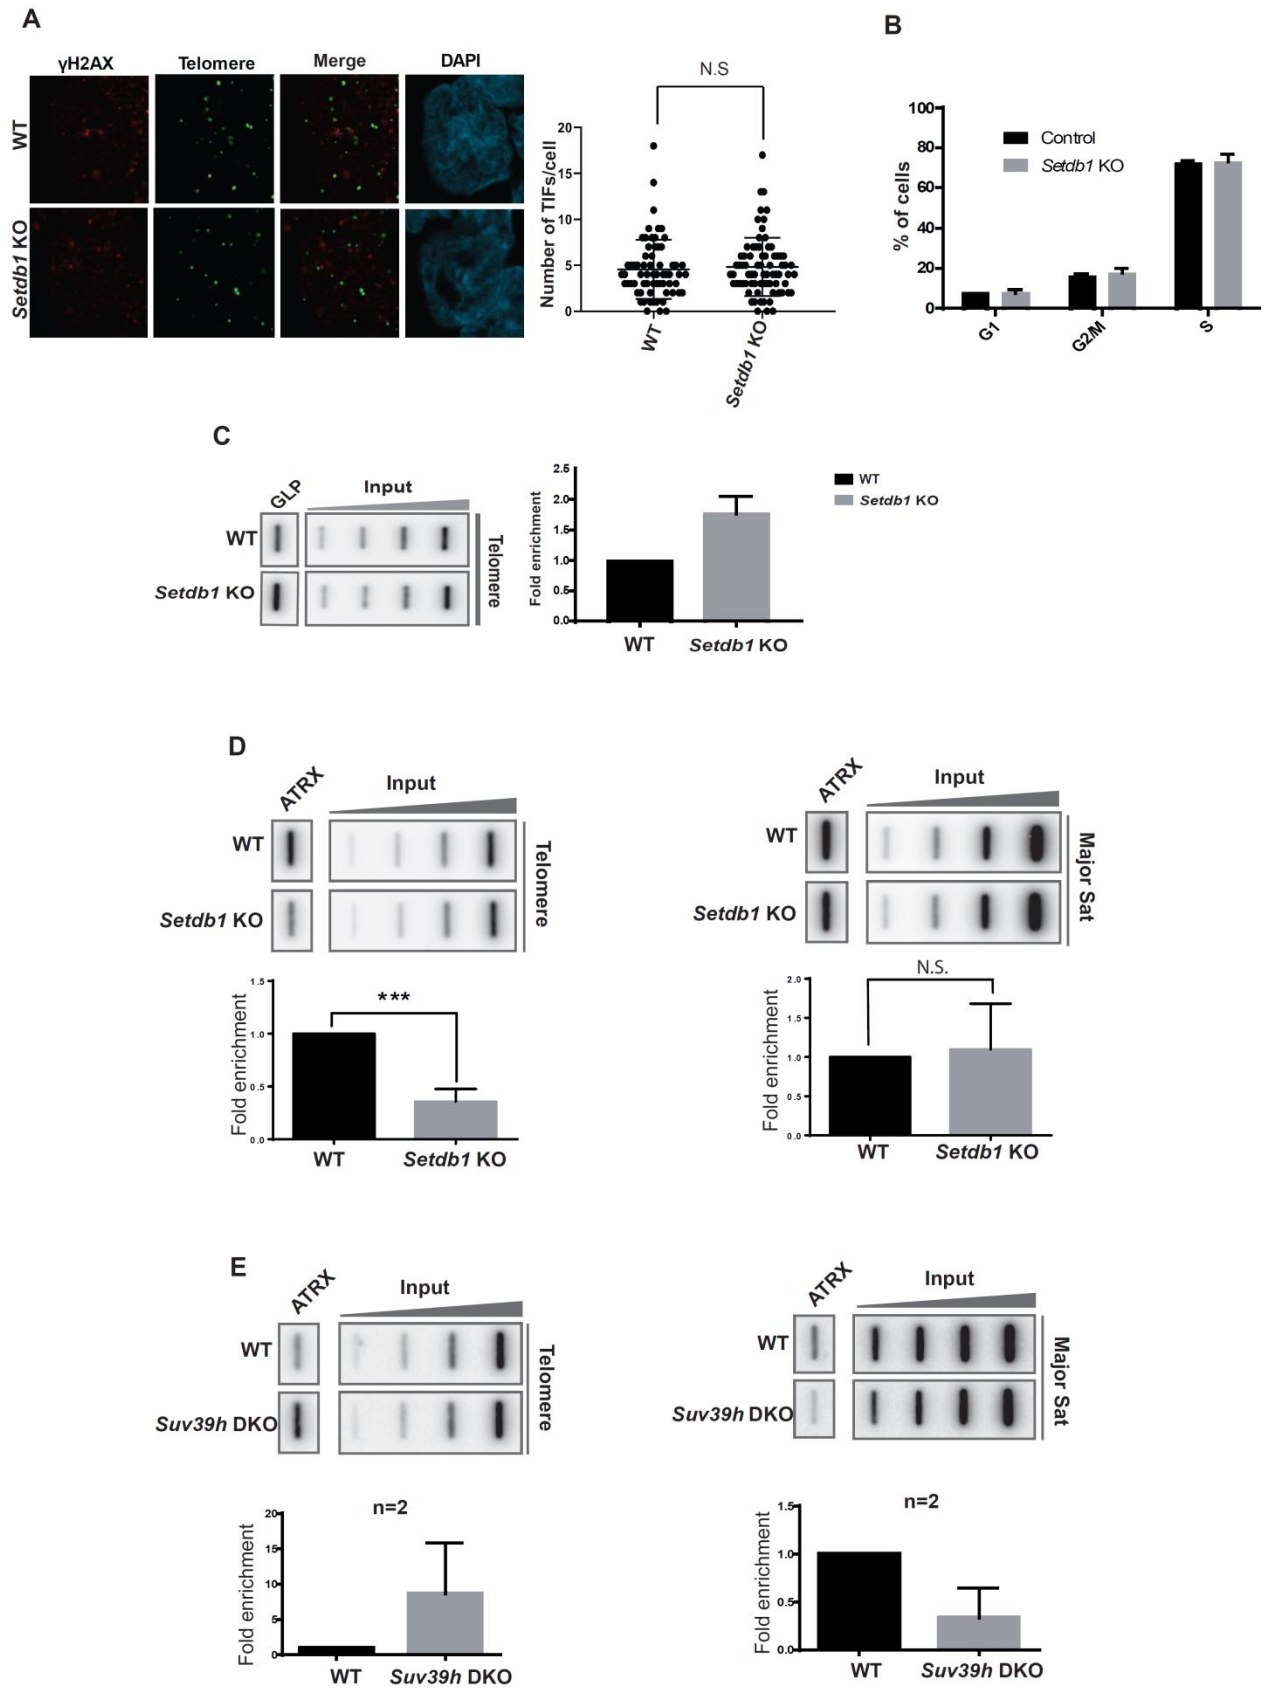

Figure S3

**Fig. S3. ATRX binds heterochromatic telomeres.** (A) (Right)  $\gamma$ H2AX immunostaining (red) combined with telomere fluorescence in situ hybridization staining (green) to identify DNA damage at telomeres. (Left) Quantification of telomeres and  $\gamma$ H2AX co-localization forming TIFs per cells in wild-type and *Setdb1* KO mESC. (B) Histogram showing the cell cycle distribution of *Setdb1* KO cells 4 days after knockout induction with tamoxifen. (C) (Left) ChIP experiments using an antibody raised against GLP on wild-type and *Setdb1*-negative chromatin from ESCs. 20% of the immunoprecipitated DNA was blotted and probed with a telomere-specific probe. (Right) Quantifications of the fold enrichment of GLP normalized by the input in *Setdb1* KO relative to the WT. (D) (Top) ChIP experiments using ATRX antibody on wild-type and *Setdb1* KO chromatin. 20% of the immunoprecipitated DNA was blotted and probed with a telomere or a pericentromere (Major Sat)-specific probe. (Bottom) Quantifications of the fold enrichment of ATRX normalized by the input in *Setdb1* KO relative to the wild-type.. (E) (Top) ChIP experiments using ATRX antibody on WT and *Suv39h* KO chromatin. 20% of the immunoprecipitated DNA was blotted and probed with a telomere or a pericentromere (Major Sat)-specific probe. (Bottom) Graph of quantifications of the fold enrichment of ATRX normalized by the input in *Suv39h* KO relative to the wild-type.

A

**Telomere DNA purification**

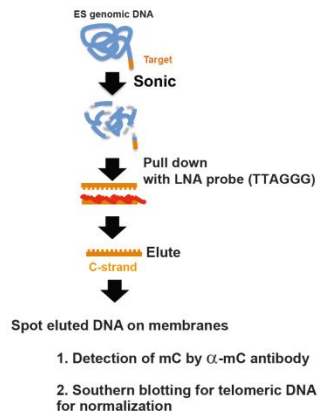

B

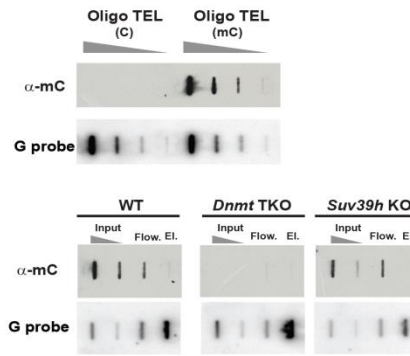

C

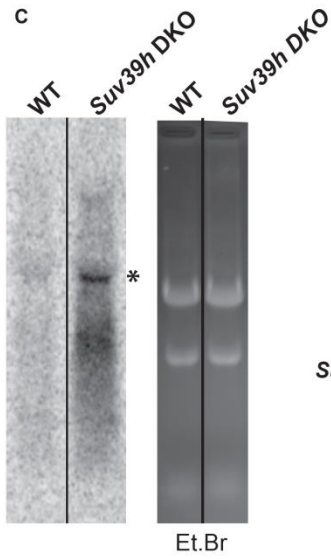

D

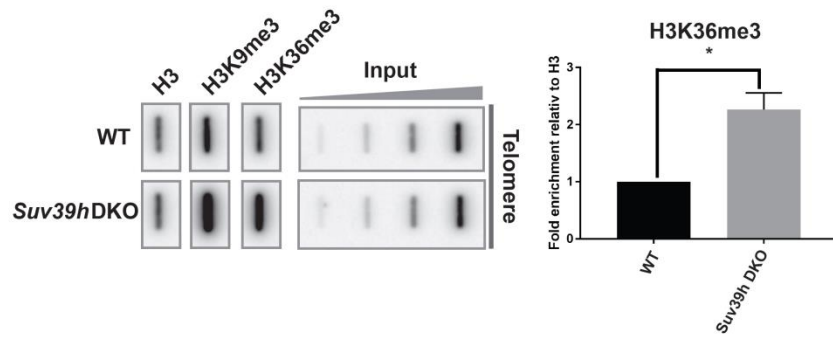

Figure S4



**Fig. S4. Telomeric heterochromatin stimulates transcriptional elongation.** (A) Strategy used to measure asymmetric DNA methylation at telomeres. Genomic DNA from WT, *Dnmt* triple KO (having virtually no DNA methylation) and *Suv39h* KO (having a strong DNMT3 enrichment at telomeres) was sheared and telomeric DNA was enriched with telomere PICH probes. The enriched DNA was eluted and spotted on nitrocellulose filters and assayed for its content in methyl-Cytosine (mC) using an anti 5MeC antibody. (B) (Top) Titration of the mC signal using known amounts of a (CCCTAA)<sub>4</sub> oligo (Oligo Tel C) or a (CCmCTAA)<sub>4</sub>+(mCCCTAA)<sub>4</sub> oligo (Oligo Tel mC). (Bottom) mC signal at purified telomeric DNA of WT, *Dnmt* TKO as negative control or *Suv39h* KO cells. (C) TERRA Northern blot showing TERRA levels in WT and *Suv39h*KO cells. (D) (Left) ChIP experiments using H3, H3K9me3 and H3K36me3 antibodies on WT and *Suv39h*KO chromatin. 20% of the immunoprecipitated DNA was blotted and probed with a telomere specific probe. (Right) Quantifications of the fold enrichment at *Suv39h* KO telomeres of H3K36 methylation normalized by the total H3 signal and to the input relative to WT.

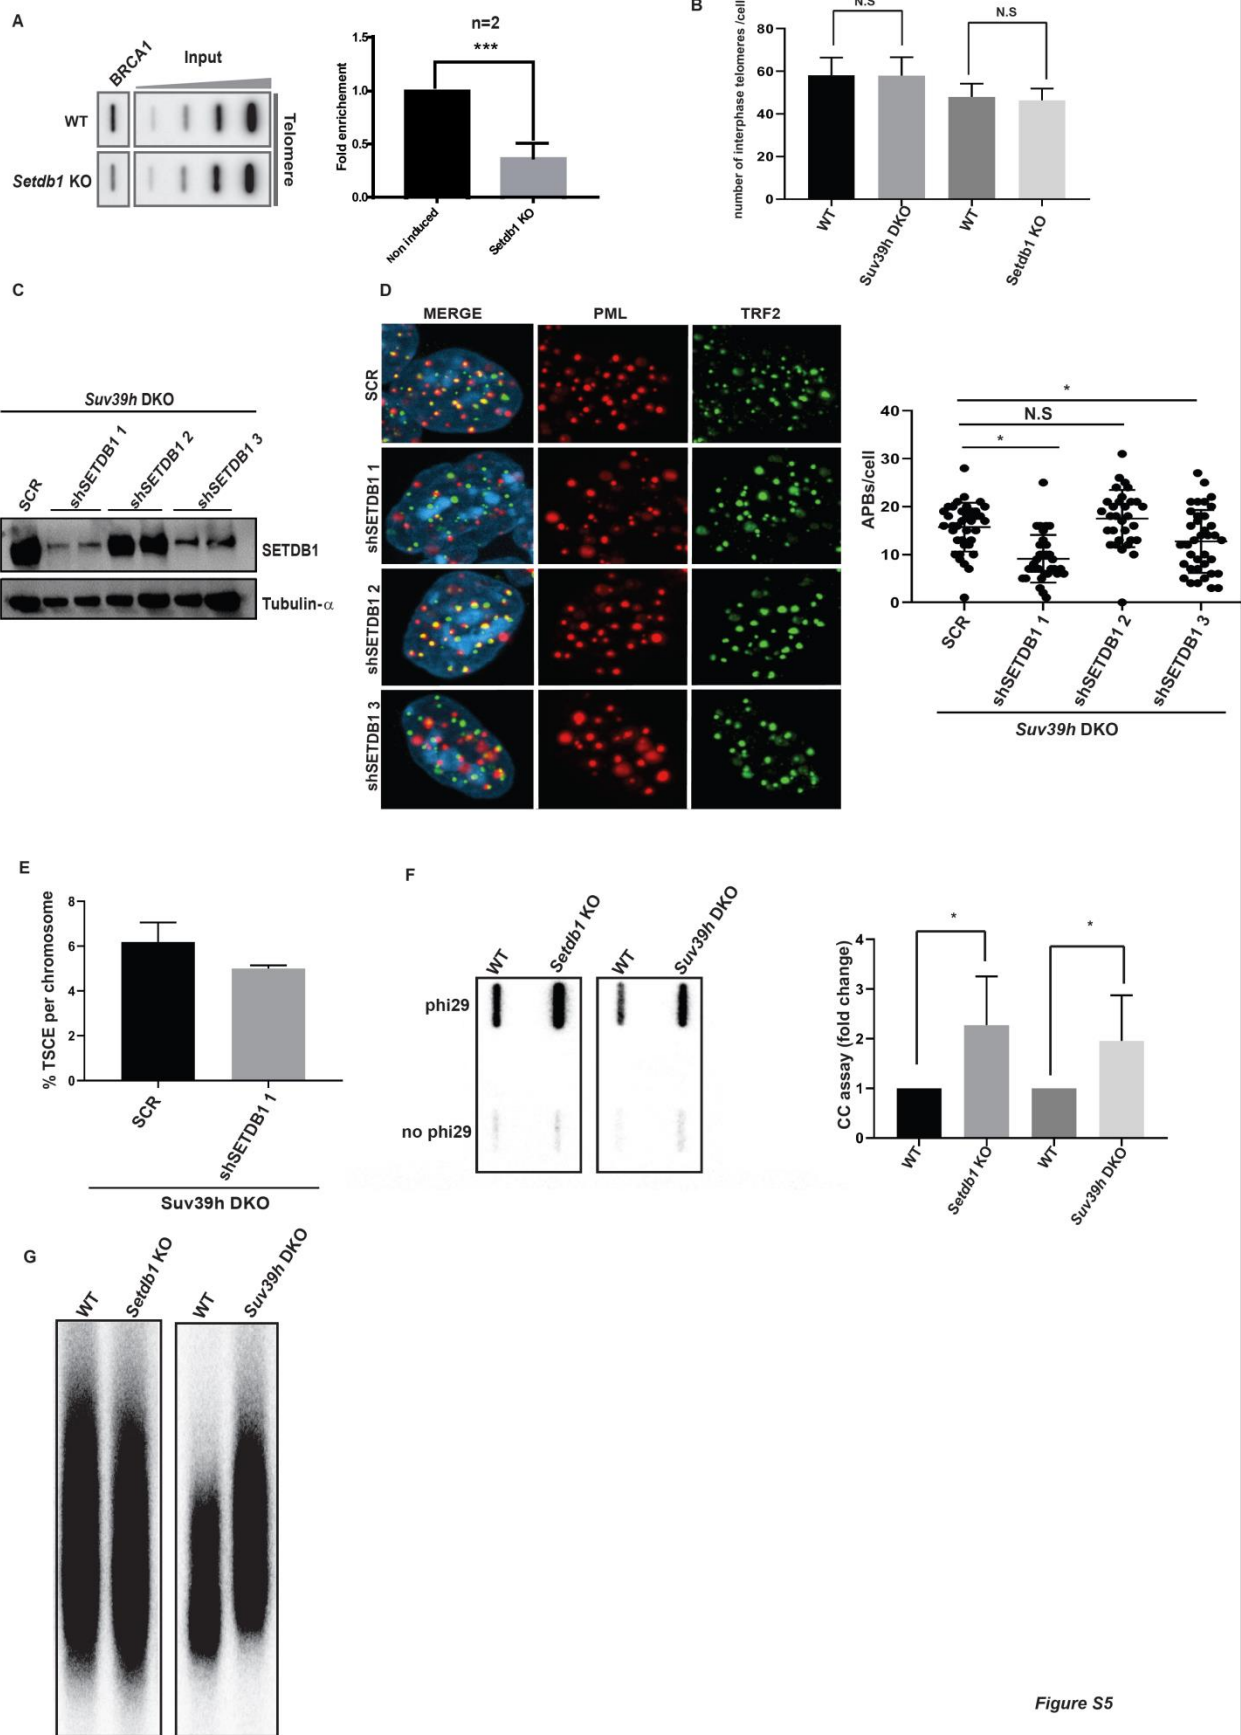

Figure S5

**Fig. S5. SETDB1-dependent heterochromatin promotes the recruitment of recombination factors and the appearance of ALT features.** (A) (Left) ChIP experiment using an anti BRCA1 antibody in wild-type non induced and *Setdb1* KO mESCs. 20% of the immunoprecipitated DNA was blotted and probed with a telomere specific probe. (Right) Quantification of the fold enrichment of BRCA1 at telomere normalized by the input relative to the wild-type. (B) Quantification of the number of interphase telomere signal per cell from FISH experiment of the wild-type and *Suv39h* or *Setdb1* negative mESCs. (C) Immunoblotting against SETDB1 or TUBULIN- $\alpha$  as a loading control in *Suv39h* negative cells transiently expressing a shRNA control or a shRNA against *Setdb1* for knock-down. (D) (Left) Immunostaining of PML (red) or TRF2 (green) in *Suv39h* negative cells knock-down for *Setdb1*. (Right) Quantification of the number of co-localizations of telomeres with PML associated Bodies per cell. (E) Quantification of the percentage of the number of T-SCE per chromosome in *Suv39h* KO cells knockdown with an shRNA against SETDB1. (F) (Left) C-circle assay in wild-type and *Setdb1* or *Suv39h* negative mESCs. (Right) Quantification of the fold change of C-circle accumulation relative to wild-type in *Setdb1* and *Suv39h* negative cells. (G) Terminal Restriction Fragment analysis of telomeres in wild-type and *Setdb1* or *Suv39h* negative cells.

A

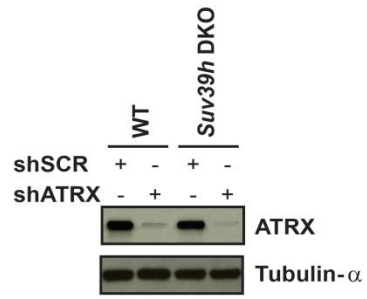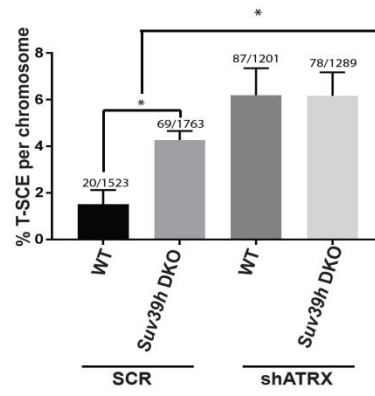

B

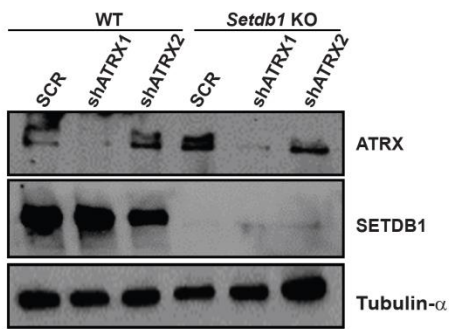

C

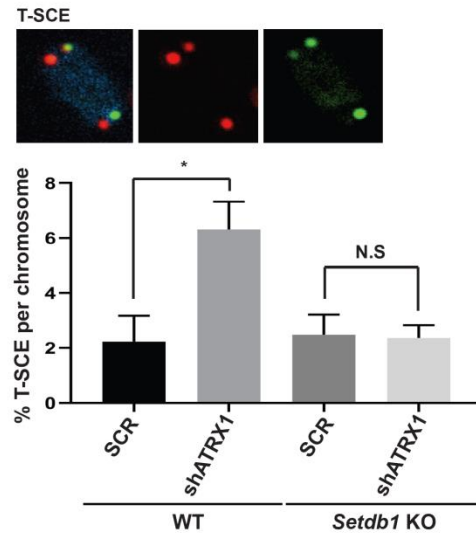

**Fig. S6. ATRX prevents recombination when telomeres are heterochromatic.** (A) Immunoblotting against ATRX or TUBULIN- $\alpha$  as loading control in wild-type or *Suv39h* negative mESCs expressing an shRNA against ATRX. (B) Quantification of % of T-SCE per chromosome upon scramble or *Atrx* knockdown in wild-type or *Suv39h* negative mESCs. (C) Immunoblotting against ATRX, SETDB1 or  $\alpha$ -TUBULIN as a loading control in wild type or *Setdb1* negative mESCs expressing an shRNA scramble or an shRNA against ATRX. (D) Visualization of T-SCE with the reciprocal exchange of the leading and lagging strands. The C-rich strand is in green and the G-rich strand is in red. Quantification of the % of T-SCE per chromosome in wild-type or *Setdb1* negative mESCs knockdown for ATRX.

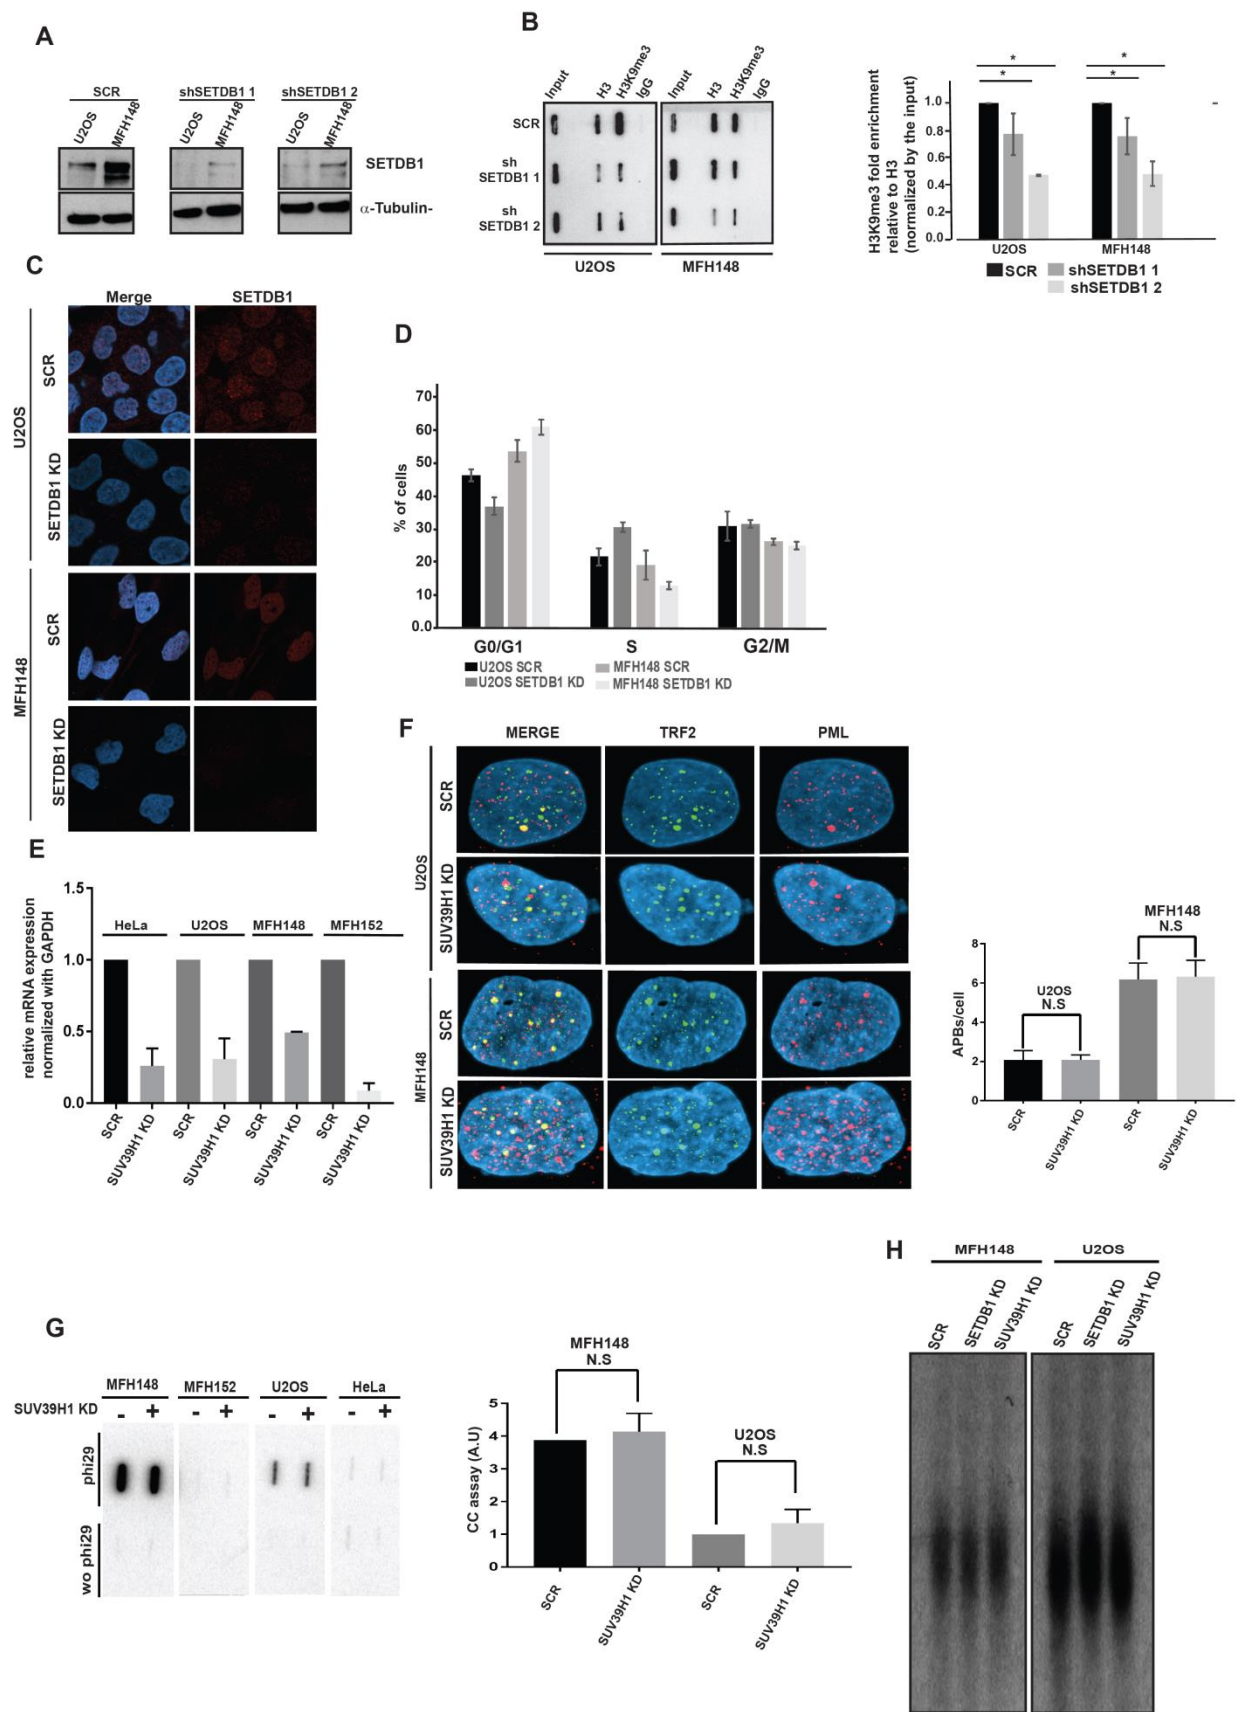

Figure S7

**Fig. S7. Loss of SETDB1 and not of SUV39H promotes ALT features.** (A) Immunoblotting against SETDB1 or TUBULIN- $\alpha$  as a loading control in ALT cell line U2OS or MFH148 transiently expressing a scramble or a Setdb1 shRNA for knock-down. (B) (Left) ChIP experiment using a H3K9me3 antibody in ALT cells U2OS or MFH148 knockdown for Setdb1. The immuno-precipitated DNA was plotted and probed with telomeric probes (Right) ChIP quantification of the fold enrichment of H3K9me3 normalized by H3 and the input relative to non-targeting scramble shRNA. (C) Immuno-staining analysis of SETDB1 in two ALT cell line U2OS and MFH148 using siRNA to induce the knock-down of Setdb1. (D) Cell cycle distribution analysed by FACS of U2OS and MFH148 upon the knock-down of Setdb1 by siRNA. (E) RT-qPCR analyses of the expression of Suv39h1 mRNA upon its knockdown by siRNA in HeLa, U2OS, MFH148 and MFH152 cells relative to the non-targeting scramble knock-down. . Data are normalized to GAPDH mRNA. (F)- (Left) Co-immunostaining of TRF2 (green) with PML (red) to measure ALT-associated PML Body formation upon Suv39h1 knockdown in two ALT cell lines U2OS and MFH148. (Right) quantification of number of telomeres associated PML bodies (APBs) per cells. (G) (Left) C-circle assay in two ALT positive cell line MFH148 and U2OS and ALT negative cell line MFH152 and HeLa upon a scramble or SUV39H1 knockdown (Right) Quantification of C-circle signal in MFH148 and U2OS upon the knockdown of SUV39H1. (H) Telomere Restriction Fragment of two ALT cell line MFH148 and U2OS upon the knock-down of Setdb1 or SUV39H1 by siRNA.

A From Fig. 1B and S1B

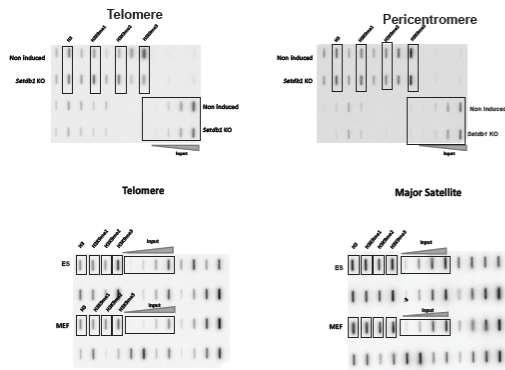

B From Fig. 2A

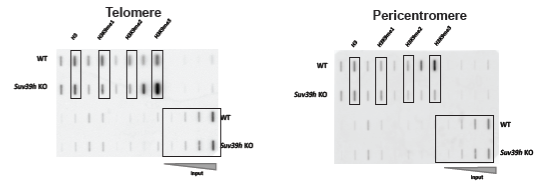

C From Fig. 3B and S3B

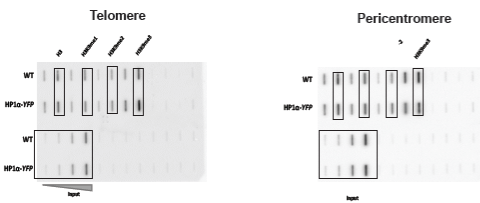

E- From Fig. 5C and S5D

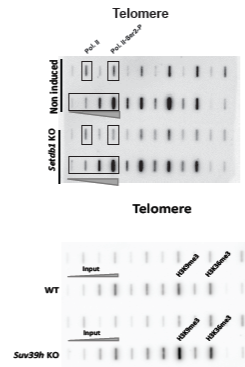

D From Fig. S4B,D,E

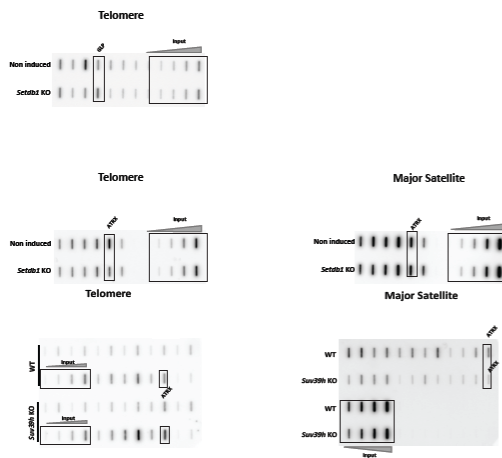

Figure S8

Fig. S8. Full membranes from which ChIP figures were prepared.



**Table S1. List of factors enriched in the telomere PICh performed with wild-type ESCs.**

**Table S2. List of factors enriched in the telomere PICh performed with wild-type mouse embryonic fibroblast cells.**

## Supplementary Materials

### REAGENT and RESOURCE

| <b>Antibodies</b>             | <b>Reference</b>                   | <b>Description</b> |
|-------------------------------|------------------------------------|--------------------|
| Anti-SETB1 (5H6A12)           | Abcam # ab107225                   | Mouse monoclonal   |
| Anti-ATRX (H300)              | Santa # Cruz sc-15408              | Rabbit polyclonal  |
| Anti-ATRX (Clone 39f)         | Millipore #MABE1798                | Mouse monoclonal   |
| Anti-TRF1 and TRF2            | Titia de Lange Lab                 | Rabbit polyclonal  |
| Anti-PML (PG-M3)              | Santa Cruz # sc-966                | Mouse monoclonal   |
| Anti-PML (H238)               | Santa Cruz # sc-5621               | Rabbit polyclonal  |
| Anti- $\gamma$ H2A.X (JBW301) | Millipore # 05-636                 | Mouse monoclonal   |
| Anti-HP1 $\alpha$ (2616)      | Cell signaling # 2616              | Rabbit polyclonal  |
| Anti-HP1 $\beta$ (1MOD 1A9)   | Euromedex #1MOD 1A9                | Mouse monoclonal   |
| Alexa Fluor 568               | Thermo Fisher Scientific # A-11004 | Goat anti-mouse    |
| Alexa Fluor 568               | Thermo Fisher Scientific # A-11011 | Goat anti-rabbit   |
| Alexa Fluor 488               | Thermo Fisher Scientific # A-11029 | Goat anti-mouse    |
| Alexa Fluor 488               | Thermo Fisher Scientific # A-11008 | Goat anti-rabbit   |

### ChIP antibodies

| <b>Antibody</b>           | <b>Reference</b>     | <b>Description</b> | <b>Dynabead</b> |
|---------------------------|----------------------|--------------------|-----------------|
| Anti-RNA pol II (N-20)    | Santa Cruz # sc-899  | Rabbit polyclonal  | Protein A       |
| Anti-RNA pol II CTD pSer2 | Active Motif #61083  | Rat monoclonal     | Protein G       |
| Anti-ATRAX (H-300)        | SantaCruz # sc-15408 | Rabbit polyclonal  | Protein A       |
| Anti-BRCA1                | Satoshi Namekawa lab | Rabbit polyclonal  | Protein A       |
| Anti-GLP                  | Abcam # Ab41969      | Rabbit polyclonal  | Protein A       |
| Anti-H3 (PAN)             | Abcam # ab1791       | Rabbit polyclonal  | Protein A       |
| Anti- H3K9me1             | Abcam # Ab9045       | Rabbit polyclonal  | Protein A       |
| Anti-H3K9me2              | Abcam # Ab1220       | Mouse monoclonal   | Protein A       |
| Anti-H3K9me3              | Abcam # ab8898       | Rabbit polyclonal  | Protein A       |
| Anti-H3K36me3             | Abcam # ab9050       | Rabbit polyclonal  | Protein A       |
| Anti-IgG Rabbit           | SantaCruz # sc-2027  | Rabbit IgG         | Protein A       |
| Anti-IgG Mouse            | SantaCruz # sc-2025  | Mouse IgG          | Protein G       |

### Western Blot

| <b>Antibody</b>    | <b>Reference</b>     | <b>Description</b> | <b>Dilution</b> |
|--------------------|----------------------|--------------------|-----------------|
| Anti-SETDB1        | Abcam # ab107225     | Mouse monoclonal   | 1:500           |
| Anti-DNMT3B        | Abcam # ab16049      | Rabbit polyclonal  | 1:500           |
| Anti-ATRAX (H-300) | SantaCruz # sc-15408 | Rabbit polyclonal  | 1:500           |
| Anti-DAXX          | Upstate # 07 471     | Rabbit polyclonal  | 1:500           |

|                                 |                        |                   |         |
|---------------------------------|------------------------|-------------------|---------|
| Anti-TRF1                       | T. de Lange # 1449     | Rabbit polyclonal | 1:1000  |
| Anti-TRF2                       | T. de Lange # 1255     | Rabbit polyclonal | 1:1000  |
| Anti-SPT 16                     | Upstate # 07225        | Rabbit polyclonal | 1:500   |
| Anti-XRN2                       | Proteintech # 112671AP | Rabbit polyclonal | 1:500   |
| Anti-H3 (PAN)                   | Abcam # ab1791         | Rabbit polyclonal | 1:10000 |
| Anti-H3.1/2                     | Millipore # ABE154     | Rabbit polyclonal | 1:500   |
| Anti-H3.3 (MO1)                 | Abnova # HOC00321      | Mouse monoclonal  | 1:200   |
| Anti-H3K9me3                    | Abcam # ab8898         | Rabbit polyclonal | 1:1000  |
| Anti-H3K36me3                   | Abcam # ab9050         | Rabbit polyclonal | 1:500   |
| Anti-H3K4me3                    | Abcam # ab8580         | Rabbit polyclonal | 1:500   |
| Anti-H3K27me3                   | Active Motif # 61017   | Mouse monoclonal  | 1:300   |
| Anti-HP1 $\alpha/\beta$ (C7F11) | Cell Signaling # 2623  | Rabbit monoclonal | 1:1000  |
| Anti-HP1 $\alpha$ (2616)        | Cell signaling # 2616  | Rabbit polyclonal | 1:1000  |
| Anti-HP1 $\beta$ (1MOD 1A9)     | Euromedex #1MOD 1A9    | Mouse monoclonal  | 1:1000  |

### Sequence based reagents

#### Commercial FISH probe

|                              |          |       |
|------------------------------|----------|-------|
| Telomere TelC-Cy3 PNA probe  | Panagene | F1002 |
| Telomere TelG-A488 LNA probe | Exiqon   |       |

- Telomeric probe:  
(CCCTAA)<sub>6</sub>
- Major Satellite probe:  
TATGGCGAGGAAAAGTGGAAAATTTAGAAATGTCCACTGTAG  
GACGTGGAATATGGCAAG

### Chemicals

| <i>Chemical</i>                             | <i>Source</i>     | <i>Reference</i> |
|---------------------------------------------|-------------------|------------------|
| (Z)-4-Hydroxytamoxifen                      | Sigma-Aldrich     | H7904            |
| Protein A Dynabeads                         | Life Technologies | 10004D           |
| Protein G Dynabeads                         | Life Technologies | 10002D           |
| Positively charged nylon Hybond XL membrane | GE Healthcare     | 45-001-151       |
| PerfectHyb Plus                             | Sigma             | 051M6009         |
| Streptavidin, Alexa Fluor 488 conjugate     | Invitrogen        | S11223           |
| TRIZOL reagent                              | Invitrogen        | 15596026         |

### Critical Commercial Assays

|                           | <i>Source</i>           | <i>Reference</i> |
|---------------------------|-------------------------|------------------|
| NorthernMax Kit           | ThermoFisher Scientific | AM1940           |
| SilverQuest               | Invitrogen              | 45-1001          |
| Polynucleotide Kinase kit | NEB                     | M0201S           |
| Prime-a-Gene kit          | Promega                 | U1100            |
